# Supplementary material
Source: MDPI journal article supplement (https://www.mdpi.com/2072-4292/12/8/1306)
Supplement: s1 [file s1]

Table S1. Administrative wards of Srinagar city

| ID | Name              | ID | Name                 | ID | Name                   |
|----|-------------------|----|----------------------|----|------------------------|
| 1  | Nishat            | 24 | Khonmoh              | 47 | Palapora               |
| 2  | Lal chowk         | 25 | Islamyarbal          | 48 | Ganpatyar              |
| 3  | Baghat-i-barzulla | 26 | Harwan               | 49 | Rajbagh                |
| 4  | Rawalpora         | 27 | Mehjoor nagar        | 50 | Jawahar nagar          |
| 5  | Allochi bagh      | 28 | Natipora             | 51 | Wazir bagh             |
| 6  | Magarmal bagh     | 29 | Chanapora            | 52 | Bemina east            |
| 7  | Zainakote         | 30 | Sheikh dawood colony | 53 | Bemina west            |
| 8  | Shaheed gunj      | 31 | Batamaloo            | 54 | Nawab bazar            |
| 9  | Karan nagar       | 32 | Nund resh colony     | 55 | Aali kadal             |
| 10 | Syed ali akbar    | 33 | Chattabal            | 56 | Hazratbal              |
| 11 | Bana mohalla      | 34 | Sathoo barbarshah    | 57 | Lal bazar              |
| 12 | Khankahi-moulla   | 35 | Aqilmir khanyar      | 58 | Locut dal              |
| 13 | S.R gunj          | 36 | Khawja bazar         | 59 | Dalgate                |
| 14 | Safa kadal        | 37 | Tarabal              | 60 | Bud dal                |
| 15 | Iddgah            | 38 | Jogi lankar          | 61 | Lawaypora              |
| 16 | Hasanabad         | 39 | Zind shah sahib      | 62 | Under cantonment board |
| 17 | Makhdoom sahib    | 40 | Jamia masjid         | 63 | Qamarwari              |
| 18 | Buchpora          | 41 | Kawdara              | 64 | Soura                  |
| 19 | Tailbal           | 42 | Zadibal              | 65 | Zoonimar               |
| 20 | New theed         | 43 | Madin sahib          | 66 | Nowshera               |
| 21 | Alasteng          | 44 | Umer colony          | 67 | Humhama                |
| 22 | Khumani chowk     | 45 | Ahmad nagar          | 68 | Maloor                 |
| 23 | Pantha chowk      | 46 | Zakora               | 69 | Parimpora              |

Table S2. Details of satellite data used

| S.No | Date        | Year | Landsat series | Sensor   | Path/row |
|------|-------------|------|----------------|----------|----------|
| 1    | 17th August | 2017 | Landsat 8      | OLI/TIRS | 149/36   |
| 2    | 27th August | 2009 | Landsat 5      | TM       | 149/36   |
| 3    | 16th August | 1999 | Landsat 5      | TM       | 149/36   |

Table S3. Characterisation of LULC classes

| Class No. | Land use class   | Description                                            |
|-----------|------------------|--------------------------------------------------------|
| 1         | Built-up dense   | Areas having dense settlement with minimal open spaces |
| 2         | Built-up sparse  | Areas having sparse settlement with open spaces        |
| 3         | Fallow           | Uncultivated land left for a period without being sown |
| 4         | Agriculture      | Cultivated land                                        |
| 5         | Forest           | Areas majorly covered with trees and other vegetation  |
| 6         | Hilly vegetation | Areas majorly vegetation above mountains               |
| 7         | Open land        | Open spaces found around other classes                 |
| 8         | Bare mountain    | Open spaces found in and around mountains              |

|    |                   |                                                                |
|----|-------------------|----------------------------------------------------------------|
| 9  | Barren            | Unutilized areas majorly in proximity to the agriculture class |
| 10 | Marshy vegetation | Vegetation found in and around water bodies                    |
| 11 | Wetland           | Water bodies enclosed in a particular area                     |
| 12 | Sand              | Areas majorly covering the river bed                           |
| 13 | River             | Areas covered with water                                       |
| 14 | Cloud             | Areas with cloud cover                                         |

Table S4. Number of reference sites associated with each class generated by probability proportional to size (PPS) sampling technique

| Land use class    | Number of reference sites for each year |      |      |
|-------------------|-----------------------------------------|------|------|
|                   | 1999                                    | 2009 | 2017 |
| Built-up dense    | 04                                      | 04   | 15   |
| Built-up sparse   | 58                                      | 64   | 83   |
| Fallow            | 209                                     | 120  | 169  |
| Agriculture       | 233                                     | 239  | 219  |
| Forest            | 207                                     | 262  | 222  |
| Hilly vegetation  | 217                                     | 235  | 202  |
| Open land         | 17                                      | 07   | 04   |
| Bare mountain     | 83                                      | 86   | 65   |
| Barren            | 37                                      | 35   | 46   |
| Marshy vegetation | 14                                      | 06   | 15   |
| Wetland           | 07                                      | 10   | 07   |
| Sand              | 07                                      | 06   | 10   |
| River             | 04                                      | 06   | 06   |
| Cloud             | 04                                      | 16   | 37   |

Figures (below)

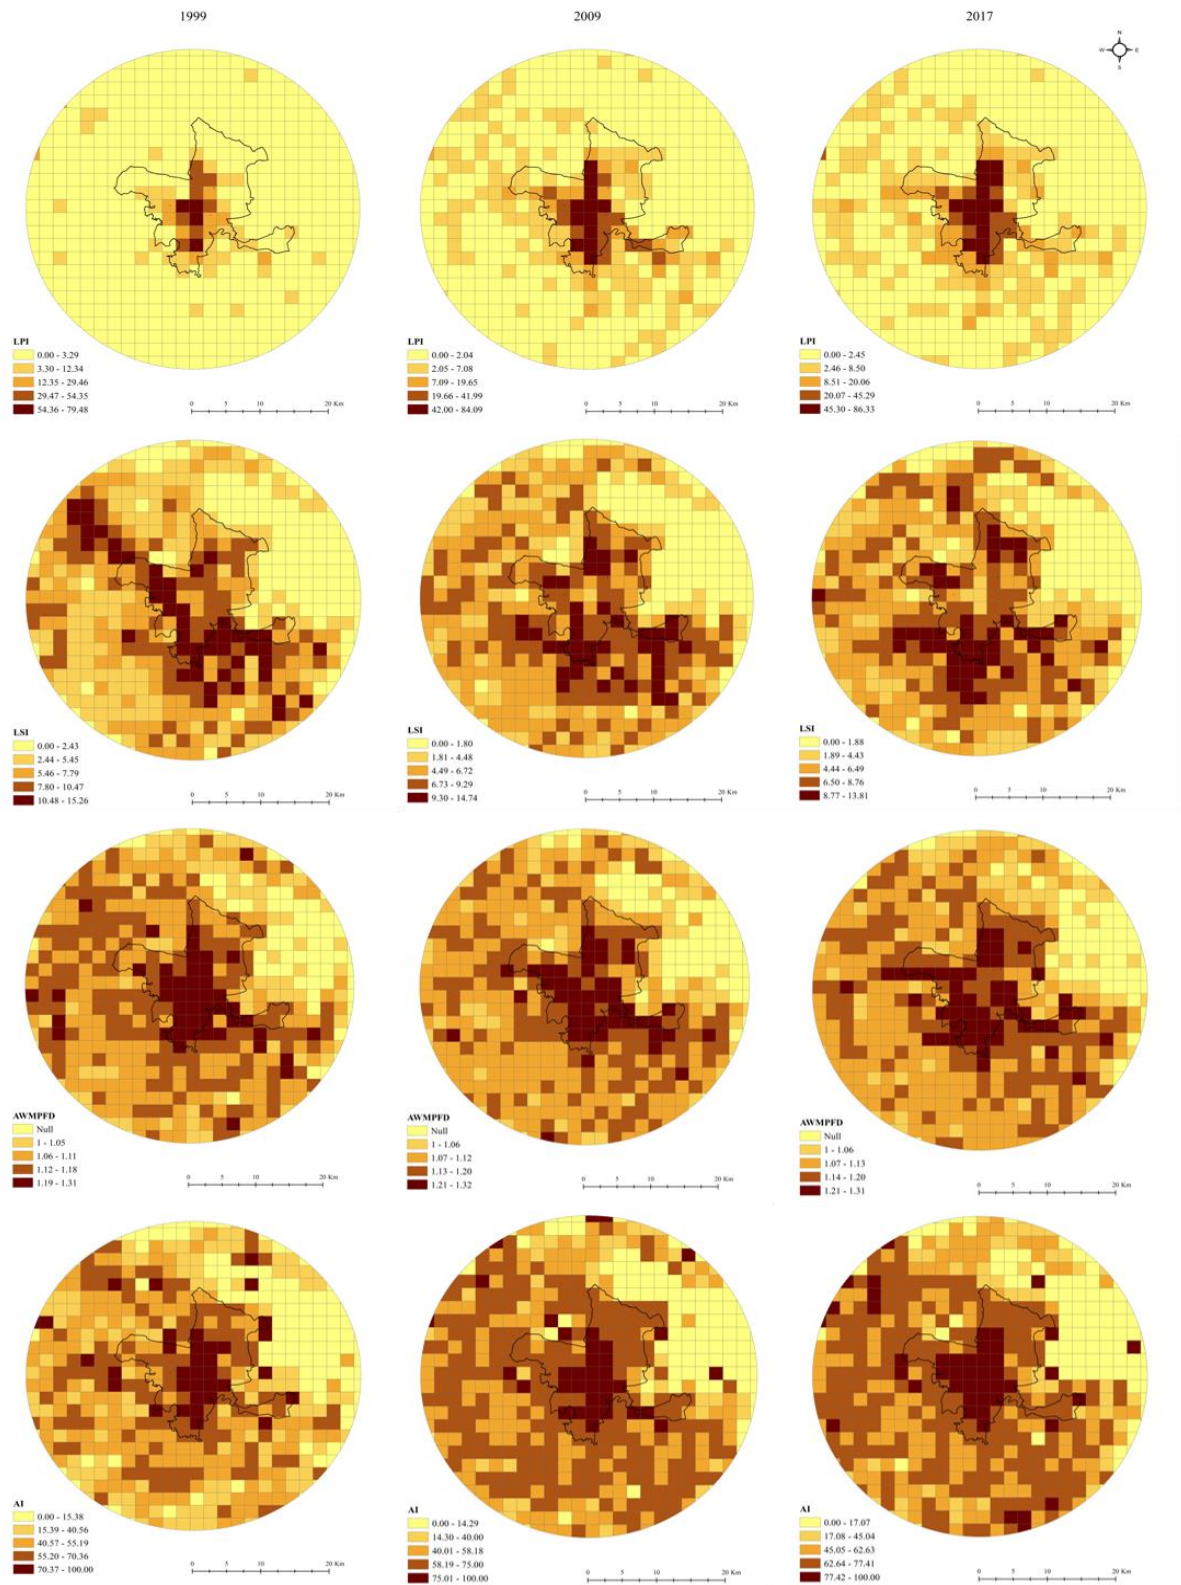

Figure S1 Landscape metrics (LPI, LSI, AWMPFD and AI) change at 2,000m cell size- year 1999, 2009 and 2017



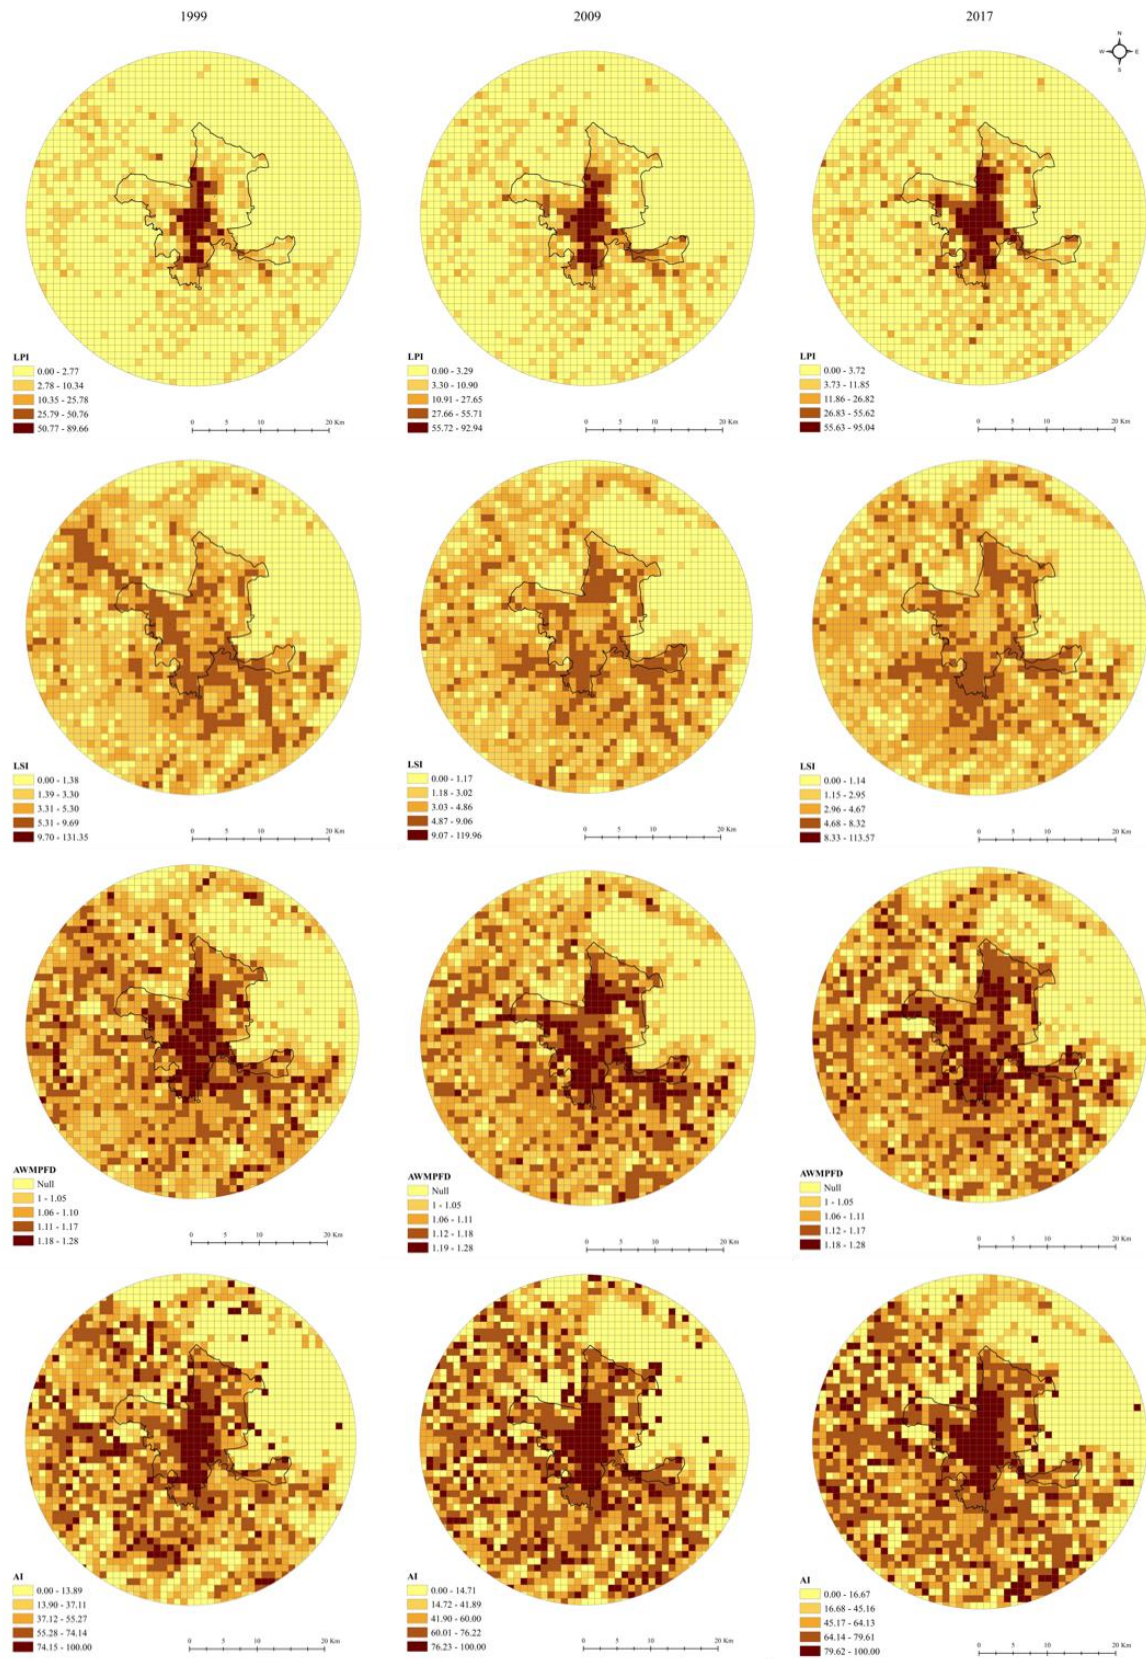

Figure S2 Landscape metrics (LPI, LSI, AWMPFD and AI) change at 1,000m cell size- year 1999, 2009 and 2017

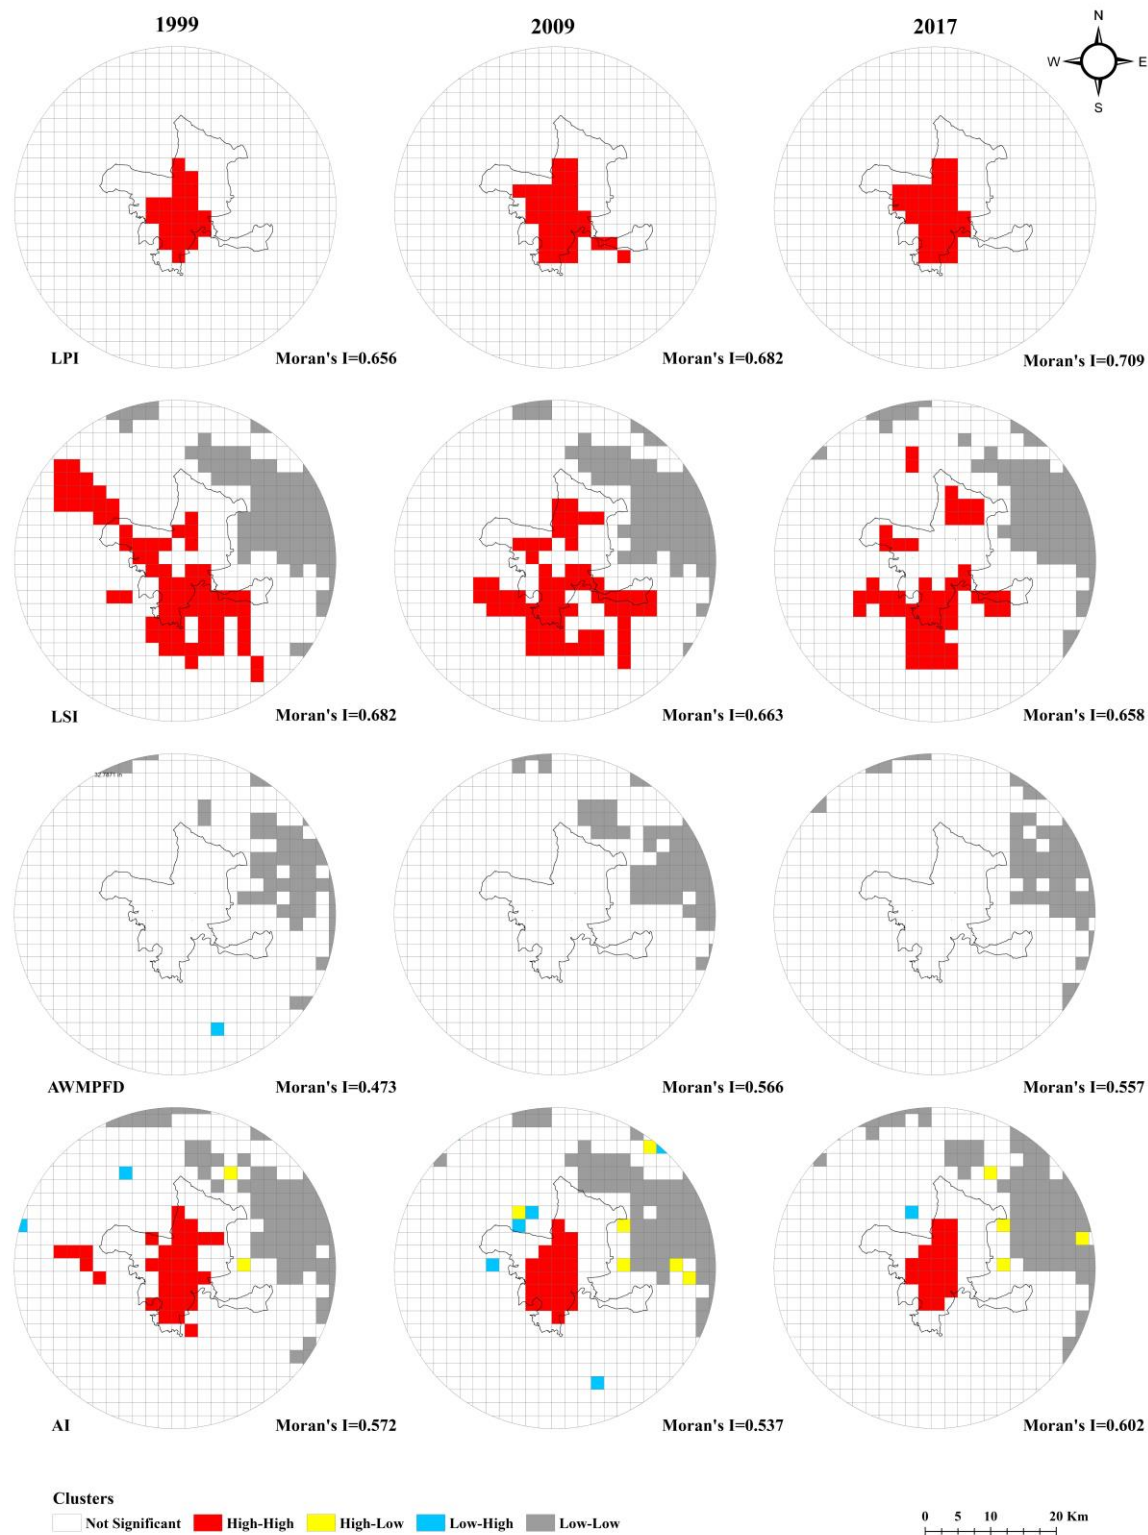

Figure S3. Spatial clusters of landscape metrics at 2,000 m cell-size in 1999, 2009 and 2017 identified through LISA along with their Global Moran's I value



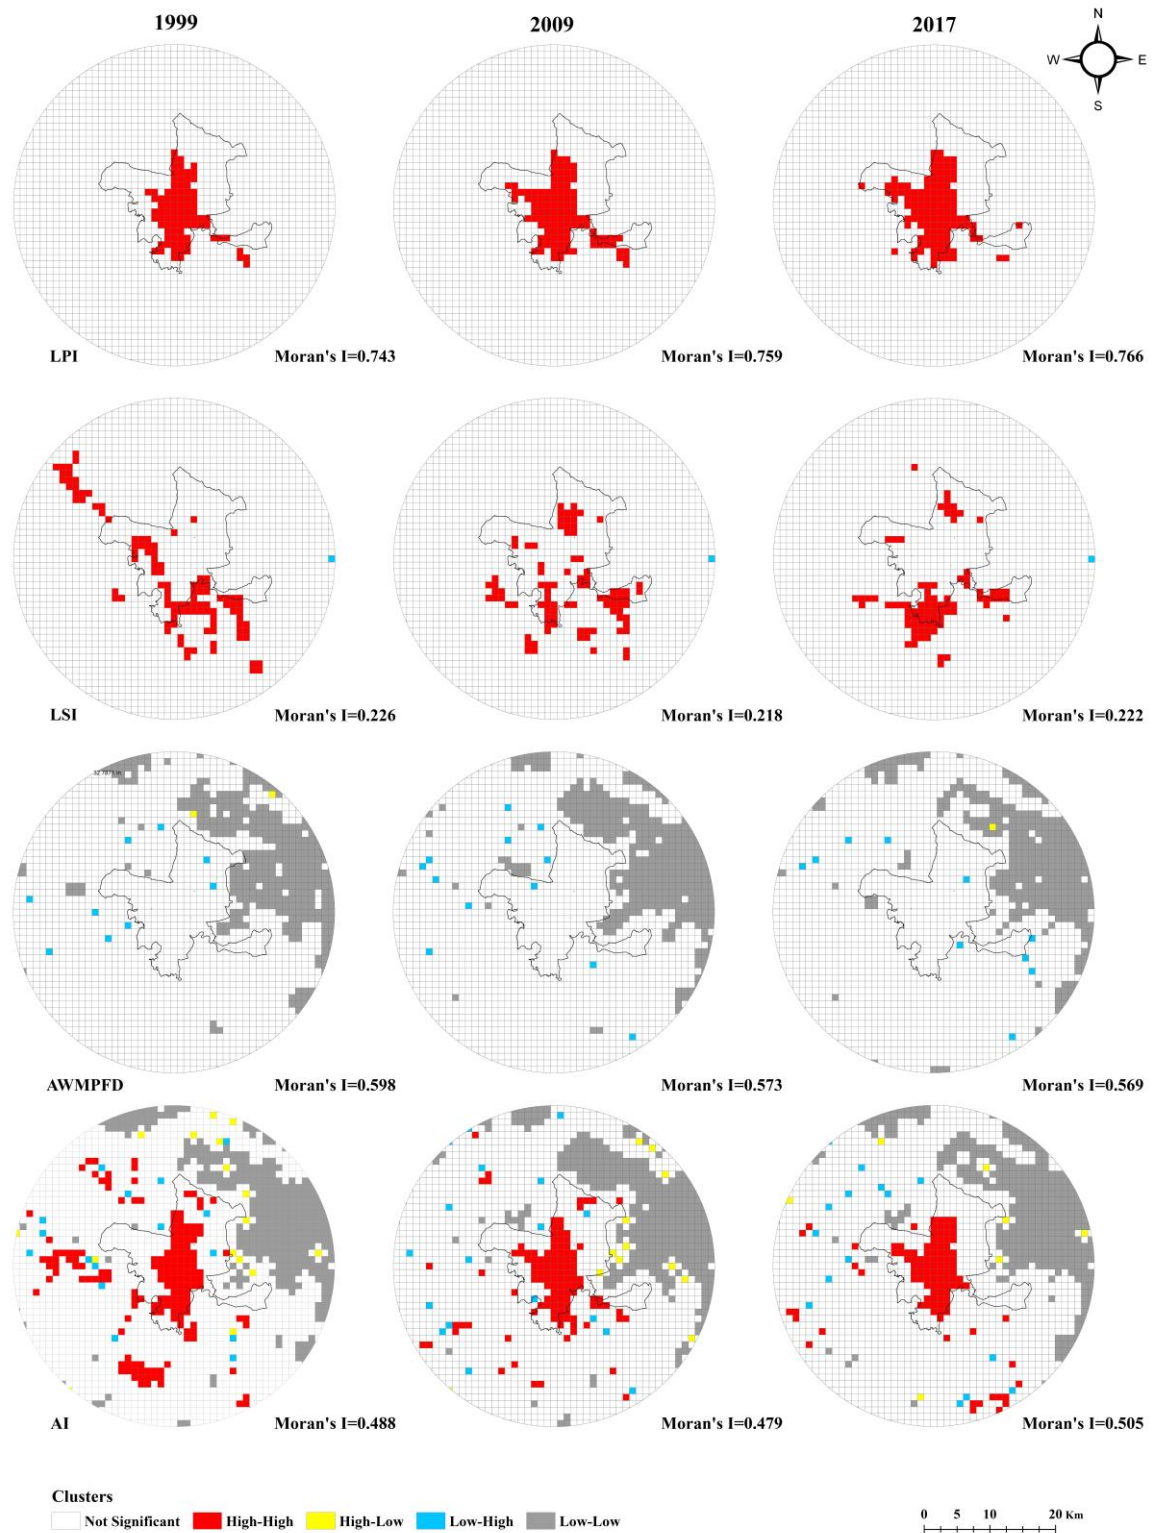

Figure S4. Spatial clusters of landscape metrics at 1,000 m cell-size in 1999, 2009 and 2017 identified through LISA along with their Global Moran's I value
